# Supplementary material
Source: PubMed Central journal article supplement (PMC4346379)
Supplement: Supp_Figure1.pdf [file Supp_Figure1.pdf]

## Supplementary Data

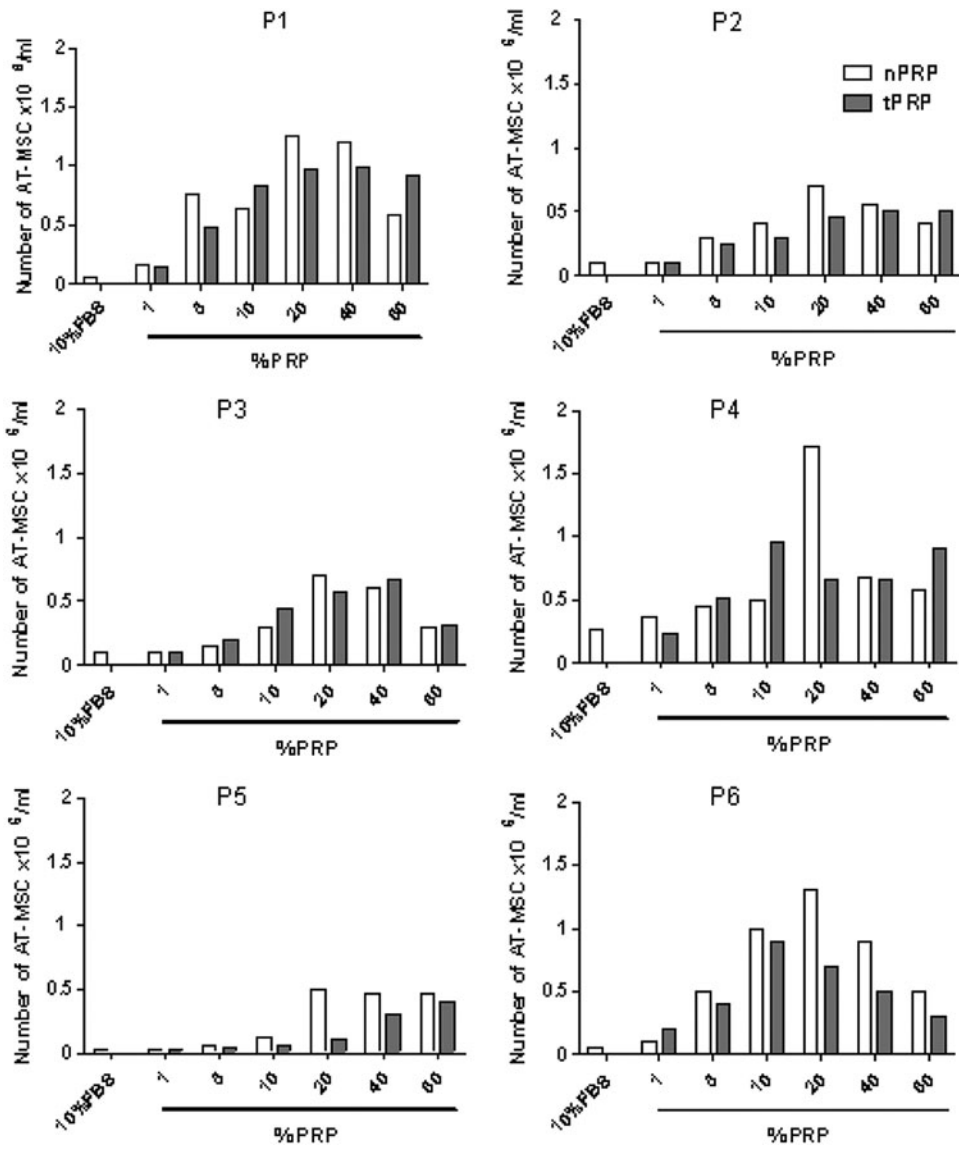

**SUPPLEMENTARY FIG. S1.** Effect of different concentrations of nonactivated platelet-rich plasma (nPRP) or thrombin-activated PRP (tPRP) ( $n=6$ ) on the proliferation of adipose-derived mesenchymal stem cell (AT-MSC) cultured over 10 days in the absence of medium change. Ten percent fetal bovine serum (FBS) is used as control. Each figure represents one patient. *Gray bars* represent tPRP and *white bars* represent nPRP cultured cells.
